# Supplementary material
Source: PubMed Central journal article supplement (PMC3175788)
Supplement: supp_blood-2011-05-352112_TableS1.pdf [file supp_blood-2011-05-352112_TableS1.pdf]

| <b>Name</b>  | <b>F/R</b> | <b>Sequence</b>                  |
|--------------|------------|----------------------------------|
| 18s          | Forward    | 5' TCCAAGGAAGGCAGCAGGC 3'        |
| 18s          | Reverse    | 5' TACCTGGTTGATCCTGCCA 3'        |
| Ctr1         | Forward    | 5' CTACTTTGGCTTTAAGAATGTGGACC 3' |
| Ctr1         | Reverse    | 5' AACATTGCTAGTAAAAACACTGCCAC 3' |
| Atp7a common | Forward    | 5' TGAACAGTCATCACCTTCATCGTC 3'   |
| Atp7a common | Reverse    | 5' TGCATCTTGTTGGACTCCTGAAAG 3'   |
| Hepcidin     | Forward    | 5' GCAAGATGGCACTAAGCACTC 3'      |
| Hepcidin     | Reverse    | 5' GCAACAGAGACCACAGGAGGAAT 3'    |
| Cp           | Forward    | 5' ACTTATGCAGATCCTGTGTGCCTATC 3' |
| Cp           | Reverse    | 5' TGCATCTTGTTGGACTCCTGAAAG 3'   |
| Atp7b        | Forward    | 5' TTAGCATCCTGGGCATGACTTG 3'     |
| Atp7b        | Reverse    | 5' TTGGTGTGTGAGGAGTCCTCTAGTGT 3' |
| Mt1a         | Forward    | 5' CTTCTTGTCGCTTACACCGTTG 3'     |
| Mt1a         | Reverse    | 5' CAGCAGCACTGTTTCGTCCTTC 3'     |
| Vegf         | Forward    | 5' ACTGCTGTACCTCCACCATGCC 3'     |
| Vegf         | Reverse    | 5' CTTTCTGCTCCCCTTCTGTCGT 3'     |
| Ankrd37      | Forward    | 5' TGCTGGAGACAGGAGCATCAGT 3'     |
| Ankrd37      | Reverse    | 5' CCACCAGGAGGCTAAGGCAC 3'       |
